# Supplementary material
Source: PubMed Central journal article supplement (PMC4696911)
Supplement: NIHMS719082-supplement-FINAL_PRODUCTION_FILE__SDC_1.pdf [file NIHMS719082-supplement-FINAL_PRODUCTION_FILE__SDC_1.pdf]

Table S1. Cox Proportional Hazards Model for Overall Survival Duration and CES-D Depression (Categorical)

| Effect                                    | Full model |        |        |                | Reduced model |        |        |                |
|-------------------------------------------|------------|--------|--------|----------------|---------------|--------|--------|----------------|
|                                           | HR         | 95% LB | 95% UB | <i>p</i> value | HR            | 95% LB | 95% UB | <i>p</i> value |
| Age                                       | 1.0        | 0.9    | 1.1    | 0.9            |               |        |        |                |
| Female                                    | 0.8        | 0.2    | 4.1    | 0.8            |               |        |        |                |
| Chemotherapy (referent: none/neoadjuvant) |            |        |        |                |               |        |        |                |
| Concurrent only                           | 1.8        | 0.4    | 7.8    | 0.4            |               |        |        |                |
| Neoadjuvant and concurrent                | 1.7        | 0.4    | 8.1    | 0.5            |               |        |        |                |
| Excessive alcohol use                     | 3.6        | 0.4    | 34.9   | 0.3            |               |        |        |                |
| Smoking status (referent: never)          |            |        |        |                |               |        |        |                |
| Former                                    | 1.5        | 0.4    | 6.2    | 0.5            |               |        |        |                |
| Recent                                    | 2.9        | 0.3    | 32.6   | 0.4            |               |        |        |                |
| Current                                   | 3.6        | 0.9    | 14.9   | 0.1            |               |        |        |                |
| Tumor size (referent: not T4/N3/N2c)      |            |        |        |                |               |        |        |                |
| Any N3/N2c                                | 2.1        | 0.5    | 9.2    | 0.3            |               |        |        |                |
| Any T4                                    | 1.0        | 0.2    | 4.5    | 0.9            |               |        |        |                |
| Total comorbidities                       | 1.2        | 0.8    | 2.0    | 0.4            | 1.4           | 1.0    | 2.0    | 0.054          |
| <b>CESD Depression</b>                    |            |        |        |                |               |        |        |                |
| <b>(categorical)</b>                      | 2.4        | 0.7    | 7.7    | 0.1            | 2.5           | 0.9    | 7.6    | 0.1            |

HR, hazard ratio; UB, upper bound; LB, lower bound. Boldface indicates statistical significance.

Table S2. Cox Proportional Hazards Model for Overall Survival Duration and CES-D Depression (Continuous)

| Effect                                    | Full model |        |        |                | Reduced model |        |        |                |
|-------------------------------------------|------------|--------|--------|----------------|---------------|--------|--------|----------------|
|                                           | HR         | 95% LB | 95% UB | <i>p</i> value | HR            | 95% LB | 95% UB | <i>p</i> value |
| Age                                       | 1.0        | 0.9    | 1.1    | 0.9            |               |        |        |                |
| Female                                    | 0.7        | 0.1    | 3.9    | 0.7            |               |        |        |                |
| Chemotherapy (referent: none/neoadjuvant) |            |        |        |                |               |        |        |                |
| Concurrent only                           | 1.5        | 0.3    | 6.5    | 0.6            |               |        |        |                |
| Neoadjuvant and concurrent                | 2.0        | 0.4    | 9.6    | 0.4            |               |        |        |                |
| Excessive alcohol use                     | 3.2        | 0.3    | 31.1   | 0.3            |               |        |        |                |
| Smoking status (referent: never)          |            |        |        |                |               |        |        |                |
| Former                                    | 1.4        | 0.4    | 5.6    | 0.6            |               |        |        |                |
| Recent                                    | 2.7        | 0.3    | 29.7   | 0.4            |               |        |        |                |
| Current                                   | 3.2        | 0.8    | 13.3   | 0.1            |               |        |        |                |
| Tumor size (referent: not T4/N3/N2c)      |            |        |        |                |               |        |        |                |
| Any N3/N2c                                | 2.1        | 0.5    | 9.3    | 0.3            |               |        |        |                |
| Any T4                                    | 1.2        | 0.3    | 5.3    | 0.8            |               |        |        |                |
| Total comorbidities                       | 1.3        | 0.8    | 2.1    | 0.3            | 1.5           | 1.0    | 2.1    | 0.041          |
| <b>CESD Depression (continuous)</b>       | 1.1        | 1.0    | 1.2    | 0.1            | 1.1           | 1.0    | 1.1    | 0.1            |

HR, hazard ratio; UB, upper bound; LB, lower bound. Boldface indicates statistical significance.

Table S3. Cox Proportional Hazards Model for Time to Recurrence and CES-D Depression (Categorical)

| Effect                                    | Full model |            |             |              | Reduced model |            |             |              |
|-------------------------------------------|------------|------------|-------------|--------------|---------------|------------|-------------|--------------|
|                                           | HR         | 95% LB     | 95% UB      | p value      | HR            | 95% LB     | 95% UB      | p value      |
| Age                                       | 1.0        | 1.0        | 1.1         | 0.3          |               |            |             |              |
| Female                                    | 0.4        | 0.1        | 3.7         | 0.4          |               |            |             |              |
| Chemotherapy (referent: none/neoadjuvant) |            |            |             |              |               |            |             |              |
| Concurrent only                           | 1.3        | 0.3        | 5.8         | 0.8          |               |            |             |              |
| Neoadjuvant and concurrent                | 0.4        | 0.0        | 4.2         | 0.5          |               |            |             |              |
| Excessive alcohol use                     | 2.8        | 0.3        | 30.1        | 0.4          |               |            |             |              |
| Total comorbidities                       | 0.9        | 0.4        | 1.6         | 0.6          |               |            |             |              |
| Tumor size (referent: not T4/N3/N2c)      |            |            |             |              |               |            |             |              |
| Any N3/N2c                                | 2.9        | 0.7        | 12.6        | 0.2          |               |            |             |              |
| Any T4                                    | 1.4        | 0.2        | 8.7         | 0.7          |               |            |             |              |
| <b>Never/former/recent smoker</b>         |            |            |             |              |               |            |             |              |
| <b>(referent: current smoker)</b>         | <b>0.3</b> | <b>0.1</b> | <b>1.1</b>  | <b>0.06</b>  | <b>0.3</b>    | <b>0.1</b> | <b>0.9</b>  | <b>0.026</b> |
| <b>CESD Depression</b>                    |            |            |             |              |               |            |             |              |
| <b>(categorical)</b>                      | <b>4.9</b> | <b>1.4</b> | <b>17.3</b> | <b>0.014</b> | <b>3.7</b>    | <b>1.2</b> | <b>11.9</b> | <b>0.025</b> |

HR, hazard ratio; UB, upper bound; LB, lower bound. Boldface indicates statistical significance.

Table S4. Cox Proportional Hazards Model for Time to Recurrence and CES-D Depression (Continuous)

| Effect                                    | Full model |            |            |              | Reduced model |            |            |              |
|-------------------------------------------|------------|------------|------------|--------------|---------------|------------|------------|--------------|
|                                           | HR         | 95% LB     | 95% UB     | p value      | HR            | 95% LB     | 95% UB     | p value      |
| Age                                       | 1.0        | 1.0        | 1.1        | 0.3          |               |            |            |              |
| Female                                    | 0.3        | 0.0        | 2.7        | 0.3          |               |            |            |              |
| Chemotherapy (referent: none/neoadjuvant) |            |            |            |              |               |            |            |              |
| Concurrent only                           | 1.1        | 0.2        | 5.3        | 0.9          |               |            |            |              |
| Neoadjuvant and concurrent                | 0.6        | 0.1        | 6.3        | 0.7          |               |            |            |              |
| Excessive alcohol use                     | 3.0        | 0.3        | 29.2       | 0.4          |               |            |            |              |
| Total comorbidities                       | 0.9        | 0.4        | 1.6        | 0.6          |               |            |            |              |
| Tumor size (referent: not T4/N3/N2c)      |            |            |            |              |               |            |            |              |
| Any N3/N2c                                | 3.1        | 0.7        | 13.8       | 0.1          |               |            |            |              |
| Any T4                                    | 1.3        | 0.2        | 7.9        | 0.8          |               |            |            |              |
| <b>Never/former/recent smoker</b>         |            |            |            |              |               |            |            |              |
| <b>(referent: current smoker)</b>         | <b>0.3</b> | <b>0.1</b> | <b>1.0</b> | <b>0.052</b> | <b>0.3</b>    | <b>0.1</b> | <b>0.8</b> | <b>0.020</b> |
| <b>CESD Depression</b>                    |            |            |            |              |               |            |            |              |
| <b>(continuous)</b>                       | <b>1.1</b> | <b>1.0</b> | <b>1.2</b> | <b>0.020</b> | <b>1.1</b>    | <b>1.0</b> | <b>1.2</b> | <b>0.037</b> |

HR, hazard ratio; UB, upper bound; LB, lower bound. Boldface indicates statistical significance.
